# Supplementary material for: Antitumor Activity of the Cardiac Glycoside αlDiginoside by Modulating Mcl-1 in Human Oral Squamous Cell Carcinoma Cells
Source: PubMed Central journal article supplement (PMC7663359; doi:10.3390/ijms21217947), 2020-10-26
Supplement: ijms-21-07947-s001.pdf [file ijms-21-07947-s001.pdf]

## SUPPORTING INFORMATION

*Article*

# **Antitumor Activity of the Cardiac Glycoside $\alpha$ -L-Diginoside by Modulating Mcl-1 in Human Oral Squamous Cell Carcinoma Cells**

**Jing-Ru Weng<sup>1,2,3,\*</sup>, Wei-Yu Lin<sup>4</sup>, Li-Yuan Bai<sup>5,6</sup>, Jing-Lan Hu<sup>5</sup>, and Chia-Hsien Feng<sup>7</sup>**

<sup>1</sup> Department of Marine Biotechnology and Resources, National Sun Yat-sen University, Kaohsiung 80424, Taiwan

<sup>2</sup> Department of Biotechnology, College of Pharmacy, Kaohsiung Medical University, Kaohsiung 80708, Taiwan

<sup>3</sup> Graduate Institute of Pharmacognosy, College of Pharmacy, Taipei Medical University, Taipei 11042, Taiwan

<sup>4</sup> Department of Pharmacy, Kinmen Hospital, Kinmen 89142, Taiwan; u8557006@gmail.com

<sup>5</sup> Division of Hematology and Oncology, Department of Internal Medicine, China Medical University Hospital, Taichung 40447, Taiwan; lybai6@gmail.com (L.-Y.B.); annavsabelle@yahoo.com.tw (J.-L.H.)

<sup>6</sup> College of Medicine, China Medical University, Taichung 40402, Taiwan

<sup>7</sup> Department of Fragrance and Cosmetic Science, College of Pharmacy, Kaohsiung Medical University, Kaohsiung 80708, Taiwan; chfeng@kmu.edu.tw

| Figure |                                                                                    | Page |
|--------|------------------------------------------------------------------------------------|------|
| S1     | $^1\text{H}$ NMR spectrum (600 MHz, $\text{CDCl}_3$ ) of $\alpha$ -L-diginoside    | 3    |
| S2     | $^{13}\text{C}$ NMR spectrum (150 MHz, $\text{CDCl}_3$ ) of $\alpha$ -L-diginoside | 4    |
| S3     | HMQC spectrum of $\alpha$ -L-diginoside                                            | 5    |
| S4     | COSY spectrum of $\alpha$ -L-diginoside                                            | 6    |
| S5     | HMBC spectrum of $\alpha$ -L-diginoside                                            | 7    |
| S6     | FAB-MS spectrum of $\alpha$ -L-diginoside                                          | 8    |

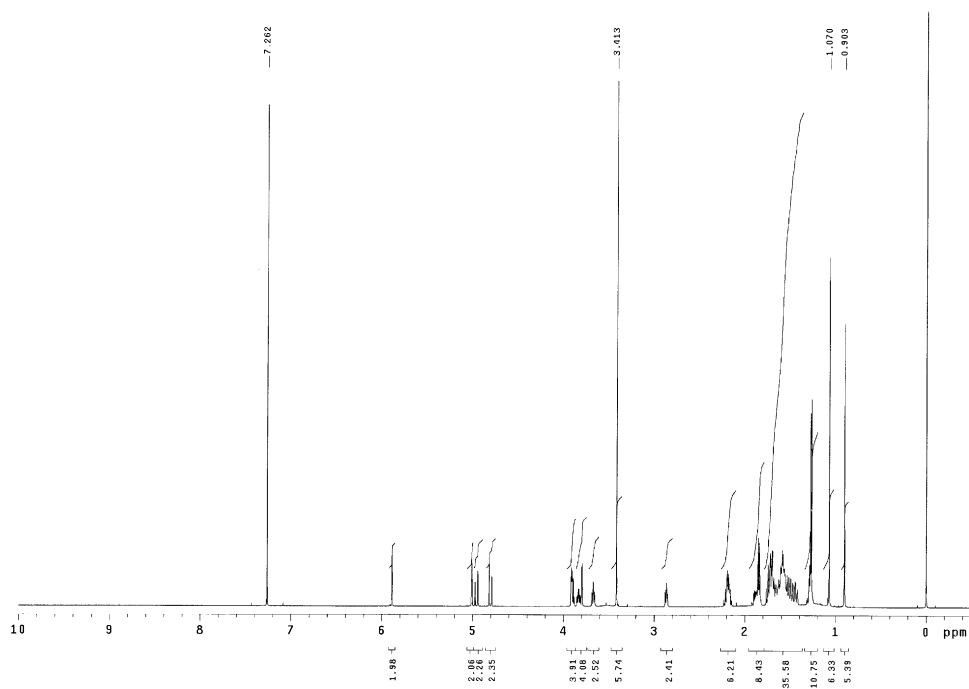

**Figure S1.**  $^1\text{H}$  NMR spectrum (600 MHz,  $\text{CDCl}_3$ ) of L-diginoside

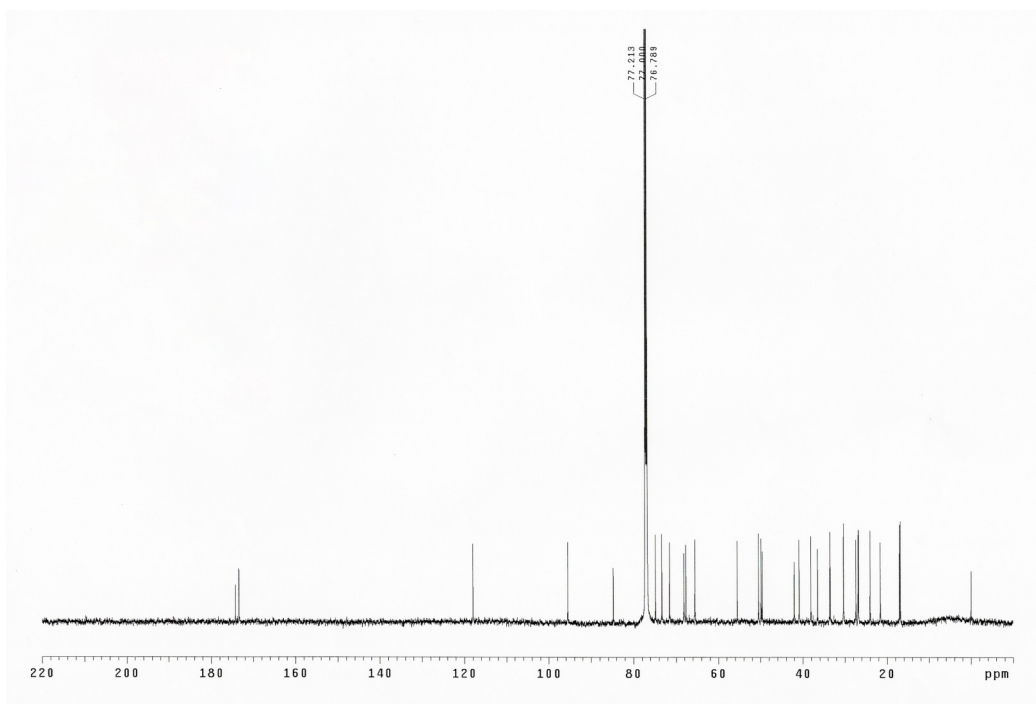

**Figure S2.**  $^{13}\text{C}$  NMR spectrum (150 MHz,  $\text{CDCl}_3$ ) of L-diginoside

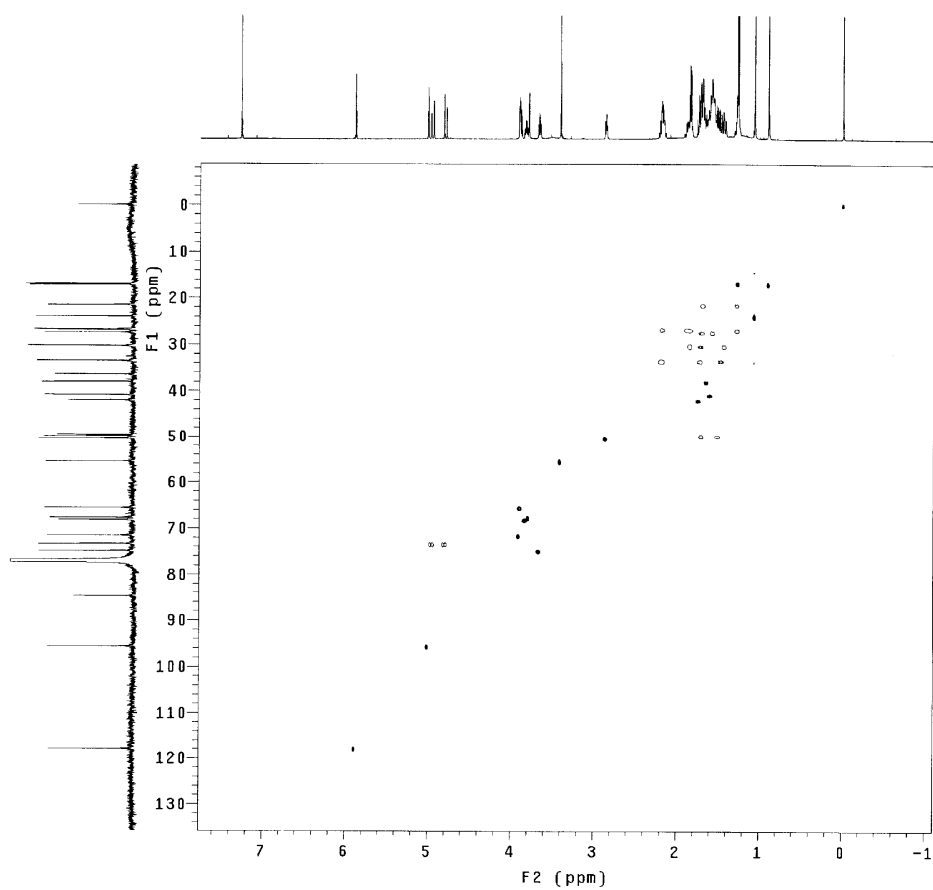

Figure S3. HMQC spectrum of L-diginoside

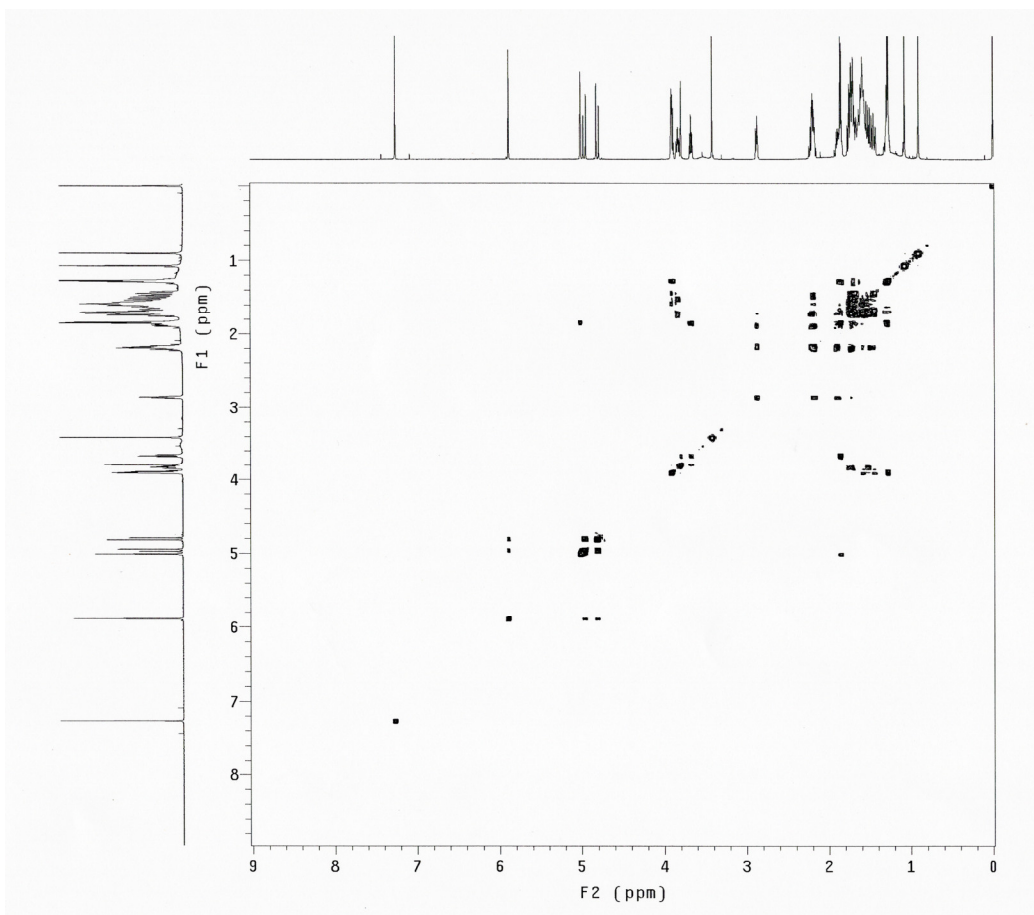

**Figure S4.** COSY spectrum of L-diginoside

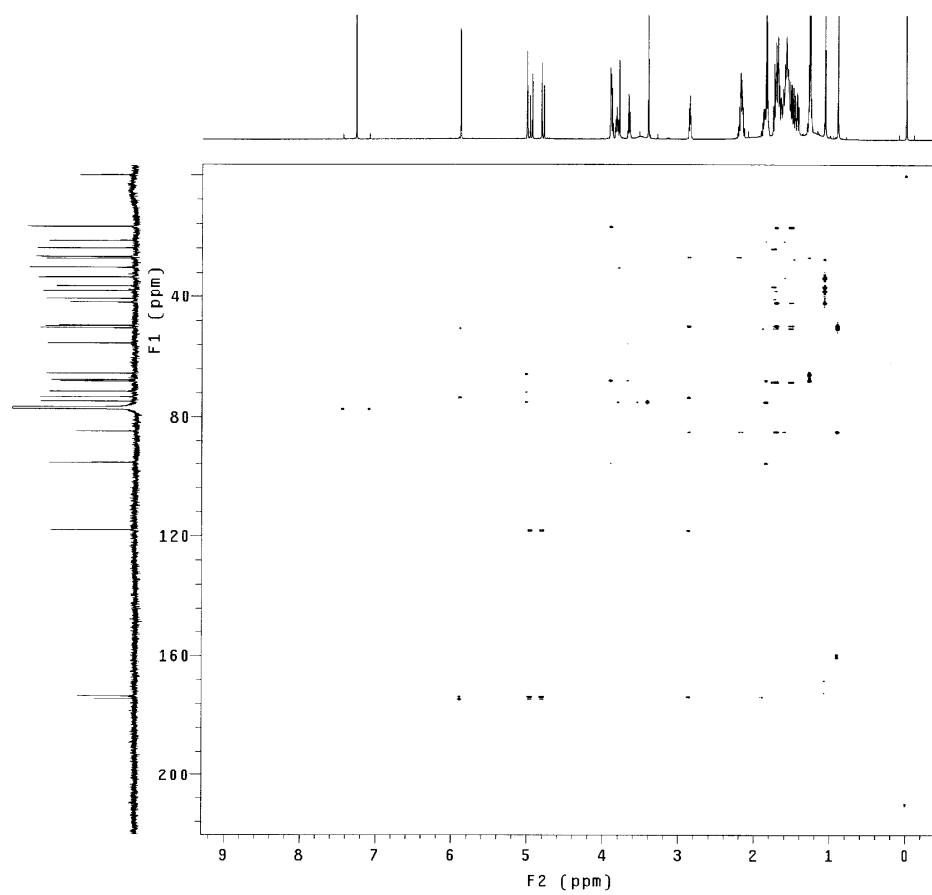

**Figure S5.** HMBC spectrum of L-diginoside

**SDP-1(glycerol)**

2015080603 1 (0.127) Cn (Top.4, Ht); Sm (Mn, 2x0.75); Sb (1,40.00); Cm (1:7)

Scan FB+  
8.59e5

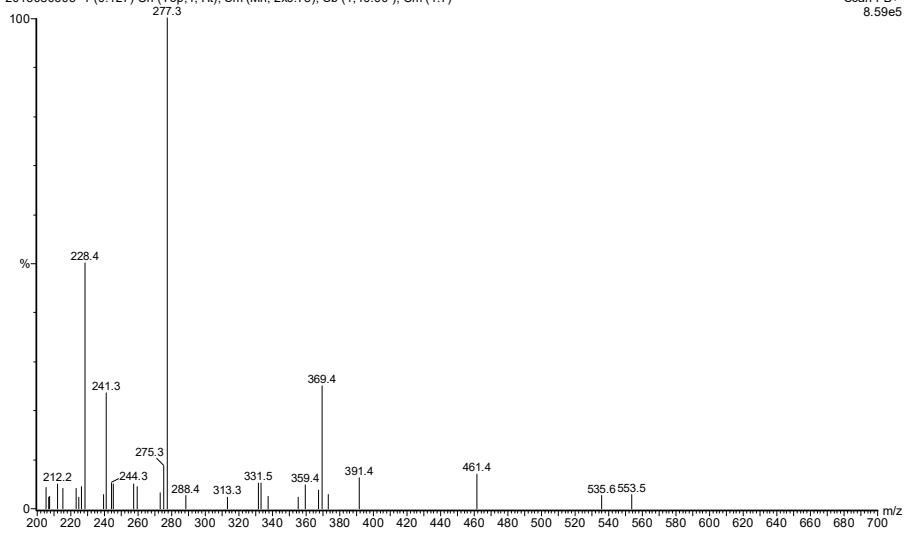

**Figure S6.** FAB-MS spectrum of L-diginoside
